## Survival analysis in hypertrophic cardiomyopathy caused by the three most common pathogenic TPM1 variants

A. Lamounier Junior<sup>1</sup>, D. Alonso Garcia<sup>2</sup>, G. Fernandez Ferro<sup>2</sup>, I.J. Cardenas Reyes<sup>2</sup>, M. Noel Brogger<sup>2</sup>, M. Valverde Gomez<sup>2</sup>, S. Garcia Hernandez<sup>2</sup>, X. Fernandez<sup>2</sup>, M. Ortiz<sup>2</sup>, R. Barriales-Villa<sup>1</sup>, W. McKenna<sup>3</sup>, L. Monserrat Iglesias<sup>2</sup>

<sup>1</sup>University of La Coruna, A Coruna, Spain; <sup>2</sup>Health in Code, A Coruna, Spain; <sup>3</sup>University College London, London, United Kingdom

**Funding Acknowledgement:** Type of funding sources: Private company. Main funding source(s): HEALTH IN CODE SL

**Purpose:** To evaluate survival free of cardiovascular events in carriers of the three most frequent TPM1 pathogenic hypertrophic cardiomyopathy (HCM) variants.

**Methods:** Clinical and genetic data on families carrying TPM1 variants in the literature and identified in our center were systematically revised and collected in a database. Classification of variant's pathogenicity was in accordance with ACMG criteria. We evaluated available follow-up data and constructed Kaplan-Meier survival curves to cardiovascular death (sudden death, appropriate cardiodefibrillator shock, heart failure death, and stroke-related death) or heart transplant. Long-rank test was used to compare event-free survival time.

**Results:** 562 carriers (343 HCM-probands and 219 relatives; 51.3% male carriers) were identified carrying 73 missense variants considered disease causing. TPM1 p.Asp175Asn (87 probands, 109 relatives, 6 unaffected), p.Arg21Leu (52 probands, 25 relatives, 16 unaffected), and p.Met281Val

(37 probands, 8 relatives, 9 unaffected) were the most prevalent HCM-variants. Among these three variants, survival data was reported for 508 individuals. Eight-nine carriers had suffered events: 74 sudden deaths (55% males), nine heart failure deaths (44% males), two transplants (50% males), and five stroke-related death (25% males). Incidence of cardiovascular death or transplant was similar between TPM1 p.Arg21Leu and p.Met281Val ( $p=0.75$ ) and different than p.Asp175Asn ( $p=0.03$  and  $p=0.06$ , respectively) and all TPM1 variants ( $p=0.004$  and  $p=0.04$ ). Analysis by sex showed TPM1 p.Arg21Leu female carriers had better prognosis than p.Asp175Asn male carriers ( $p=0.048$ ) and all TPM1 male and female carriers ( $p=0.02$  and  $p=0.04$ ) (curves not showed in the graph).

**Conclusion:** TPM1 p.Arg21Leu and p.Met281Val could have a better prognosis than p.Asp175Asn and all other TPM1 missense variants in HCM. No marked difference was observed between male and female carriers. More than 80% of the events were arrhythmic deaths.

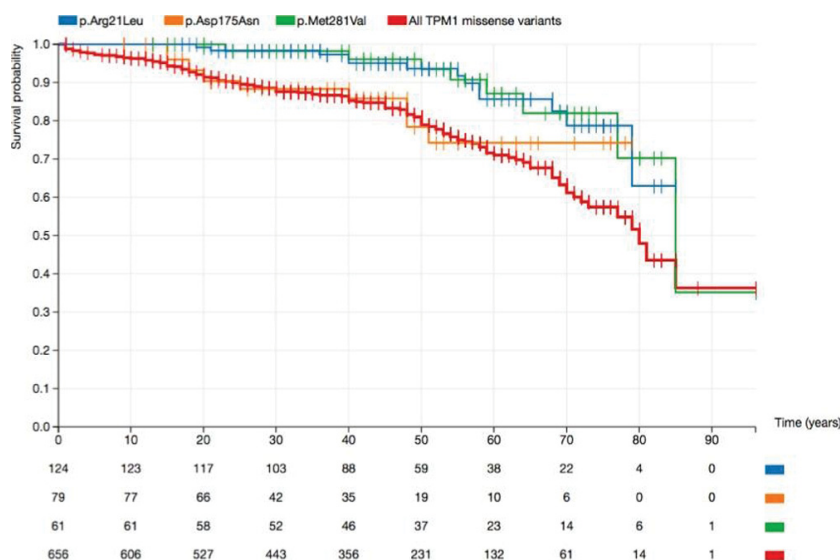

Source: http://academic.oup.com/eurheartj/article-pdf/42/Supplement_1/ehab724.1763/40589797/ehab724.1763.pdf
